# Supplementary material for: Synthesis and properties of a benzo[1,2-b:4,5-b′]dithiophene core π-system that bears alkyl, alkylthio and alkoxy groups at 3,7-positions
Source: Royal Society of Chemistry journal article supplement (doi:10.1039/c3ra41822g), 2013-01-01

## Electronic Supplementary Information for:

### A benzo[1,2-*b*:4,5-*b'*]dithiophene core $\pi$ -system that bears alkyl, alkylthio and alkoxy groups at 3,7-positions

Shinya Ota,<sup>a</sup> Sojiro Minami,<sup>a</sup> Koji Hirano,<sup>a</sup> Tetsuya Satoh,<sup>a</sup> Yutaka Ie,<sup>b</sup> Shu Seki,<sup>\*a</sup> Yoshio Aso<sup>b</sup> and Masahiro Miura<sup>\*a</sup>

<sup>a</sup> Department of Applied Chemistry, Faculty of Engineering, Osaka University, Suita, Osaka 565-0871, Japan. E-mail: [seki@chem.eng.osaka-u.ac.jp](mailto:seki@chem.eng.osaka-u.ac.jp); [miura@chem.eng.osaka-u.ac.jp](mailto:miura@chem.eng.osaka-u.ac.jp)

<sup>b</sup> The Institute of Scientific and Industrial Research, Osaka University, 8-1 Mihogaoka, Ibaraki, Osaka 567-0047, Japan

#### Contents

<sup>1</sup>H and <sup>13</sup>C NMR Spectra

S2–S22

[  $^1\text{H}$  and  $^{13}\text{C}$  NMR Spectra of **5** ]

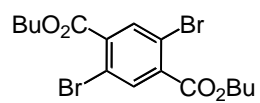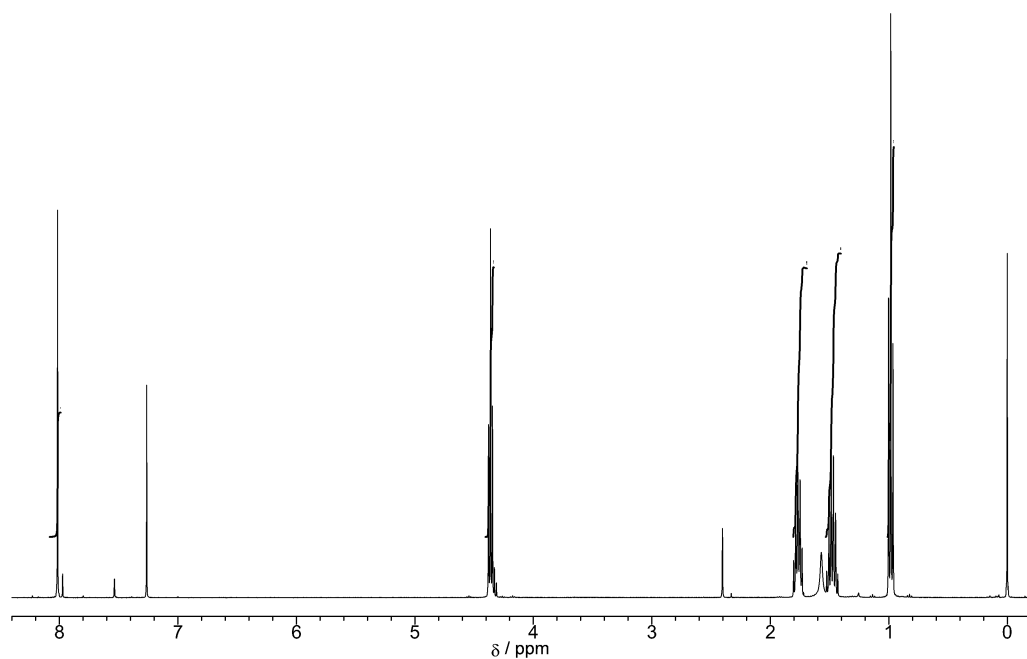

| No. | ppm    | Hz      | Amp.  | Height |
|-----|--------|---------|-------|--------|
| 1   | 13.82  | 1389.6  | 91459 | 97.03  |
| 2   | 19.34  | 1943.6  | 83349 | 88.43  |
| 3   | 30.64  | 3079.4  | 79292 | 84.12  |
| 4   | 66.37  | 6670.8  | 51165 | 54.28  |
| 5   | 120.17 | 12079.4 | 33592 | 35.64  |
| 6   | 135.92 | 13661.8 | 34311 | 36.40  |
| 7   | 136.58 | 13728.0 | 62277 | 66.07  |
| 8   | 164.52 | 16536.3 | 16674 | 17.69  |

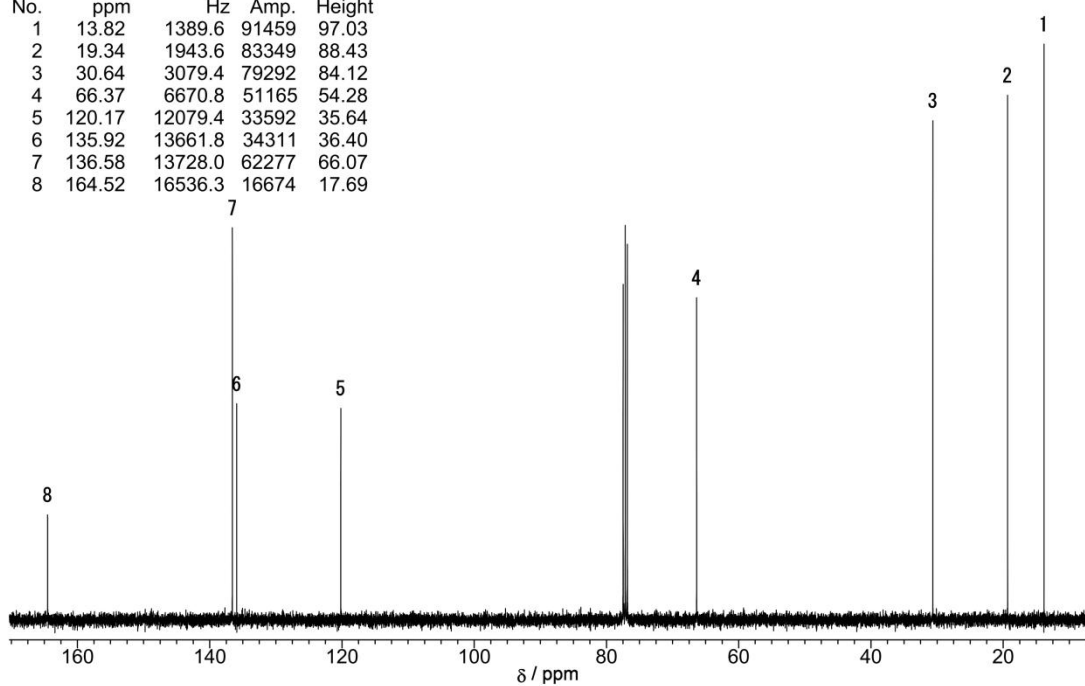

[<sup>1</sup>H and <sup>13</sup>C NMR Spectra of **6**]

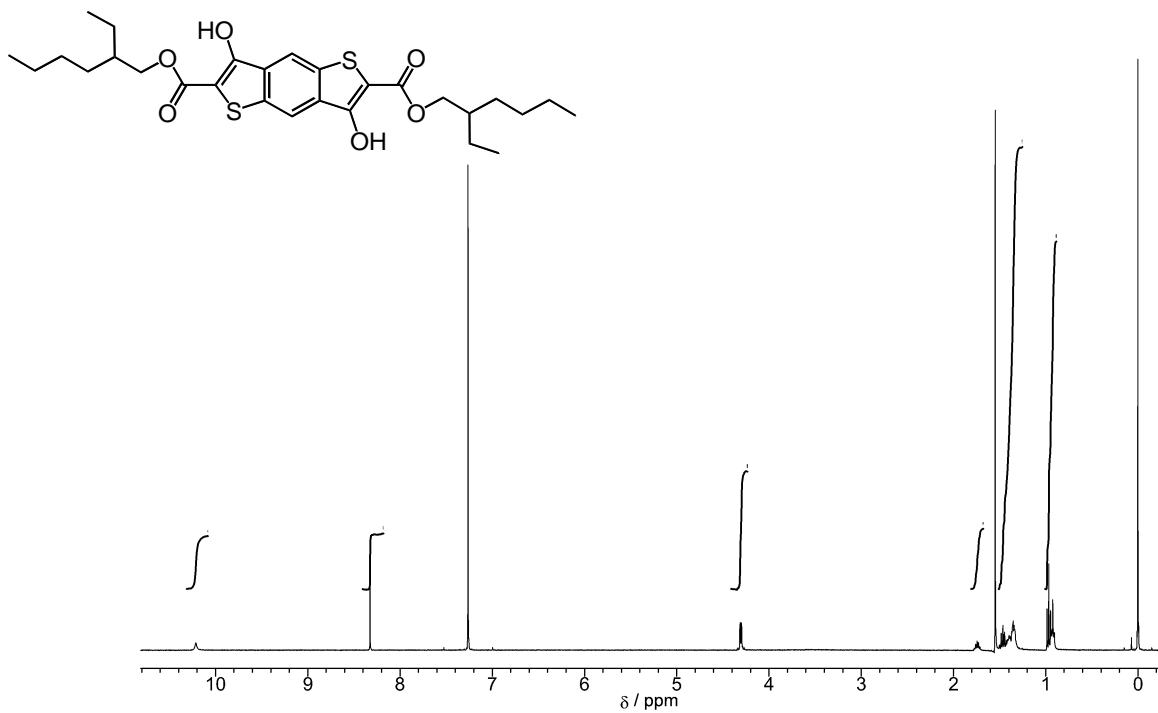

| No. | ppm    | Hz      | Height |
|-----|--------|---------|--------|
| 1   | 167.31 | 16817.1 | 4.58   |
| 2   | 158.16 | 15897.9 | 4.82   |
| 3   | 134.89 | 13558.3 | 8.62   |
| 4   | 131.77 | 13244.9 | 7.12   |
| 5   | 117.65 | 11825.4 | 12.89  |
| 6   | 104.23 | 10476.8 | 5.41   |
| 7   | 68.11  | 6846.2  | 28.59  |
| 8   | 38.96  | 3916.1  | 45.89  |
| 9   | 30.58  | 3073.6  | 50.58  |
| 10  | 29.09  | 2924.1  | 55.76  |
| 11  | 24.02  | 2414.2  | 46.77  |
| 12  | 23.10  | 2322.2  | 43.18  |
| 13  | 14.20  | 1427.0  | 48.01  |
| 14  | 11.22  | 1128.0  | 40.98  |

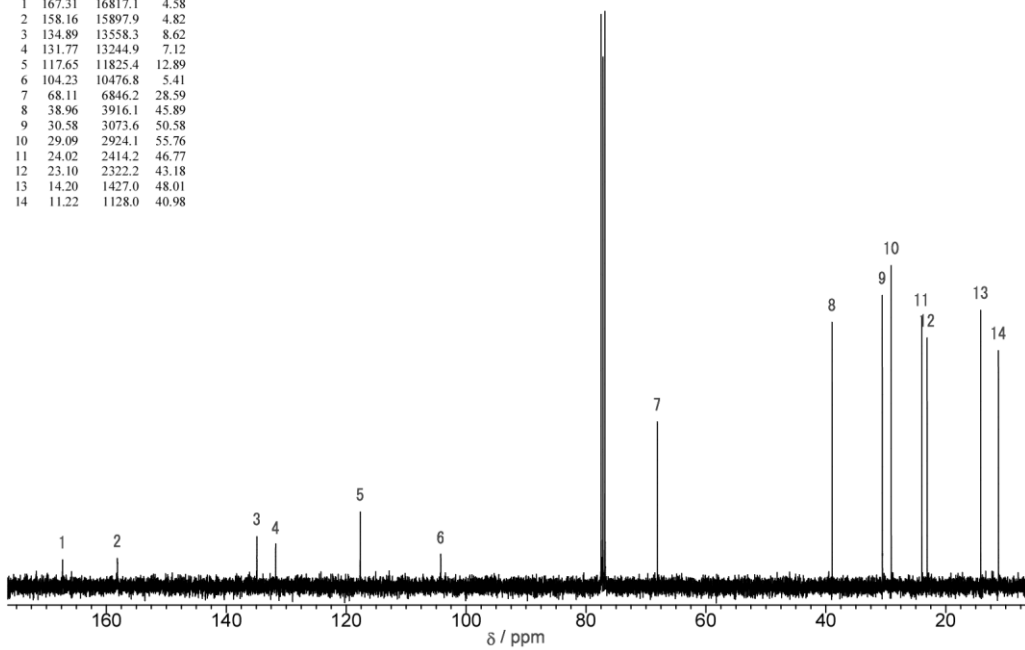

[<sup>1</sup>H and <sup>13</sup>C NMR Spectra of 7]

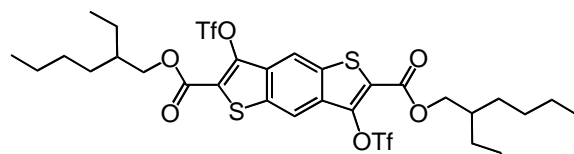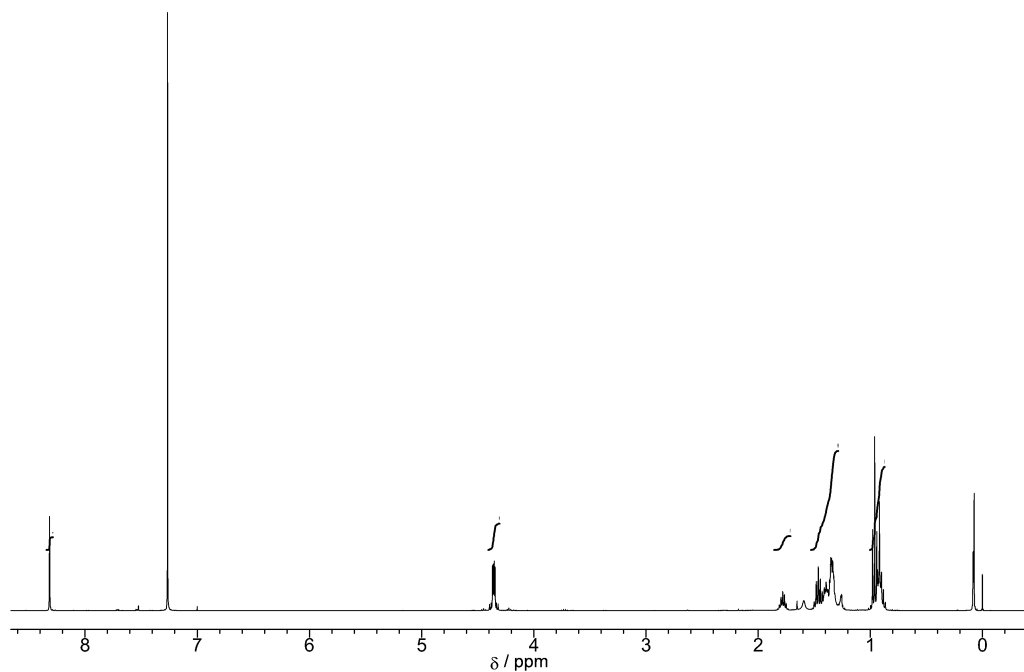

| No. | ppm    | Hz      | Height |
|-----|--------|---------|--------|
| 1   | 159.87 | 15912.3 | 28.57  |
| 2   | 138.41 | 13777.0 | 34.84  |
| 3   | 134.61 | 13398.4 | 31.23  |
| 4   | 131.71 | 13109.4 | 46.27  |
| 5   | 126.39 | 12580.1 | 26.70  |
| 6   | 123.60 | 12302.6 | 3.05   |
| 7   | 120.37 | 11981.2 | 12.28  |
| 8   | 117.14 | 11659.8 | 8.68   |
| 9   | 116.90 | 11636.0 | 26.77  |
| 10  | 113.92 | 11339.4 | 3.06   |
| 11  | 69.27  | 6895.3  | 54.20  |
| 12  | 38.80  | 3861.6  | 64.25  |
| 13  | 30.40  | 3026.2  | 63.65  |
| 14  | 28.96  | 2882.2  | 100    |
| 15  | 23.85  | 2373.9  | 86.03  |
| 16  | 23.07  | 2296.6  | 81.18  |
| 17  | 14.13  | 1406.9  | 63.42  |
| 18  | 11.05  | 1099.8  | 75.05  |

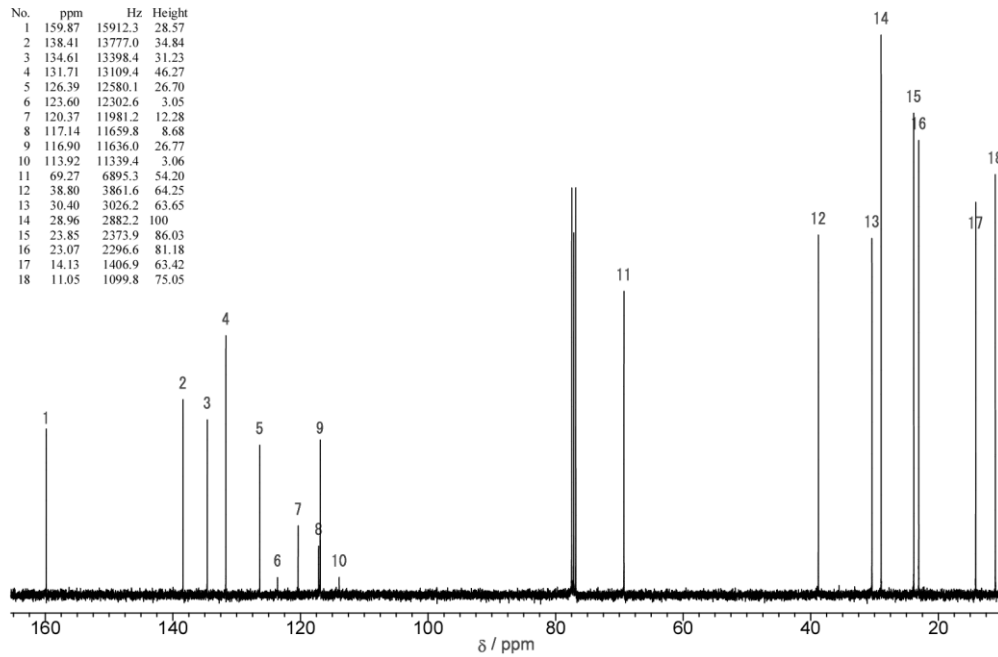

[<sup>1</sup>H and <sup>13</sup>C NMR Spectra of **8**]

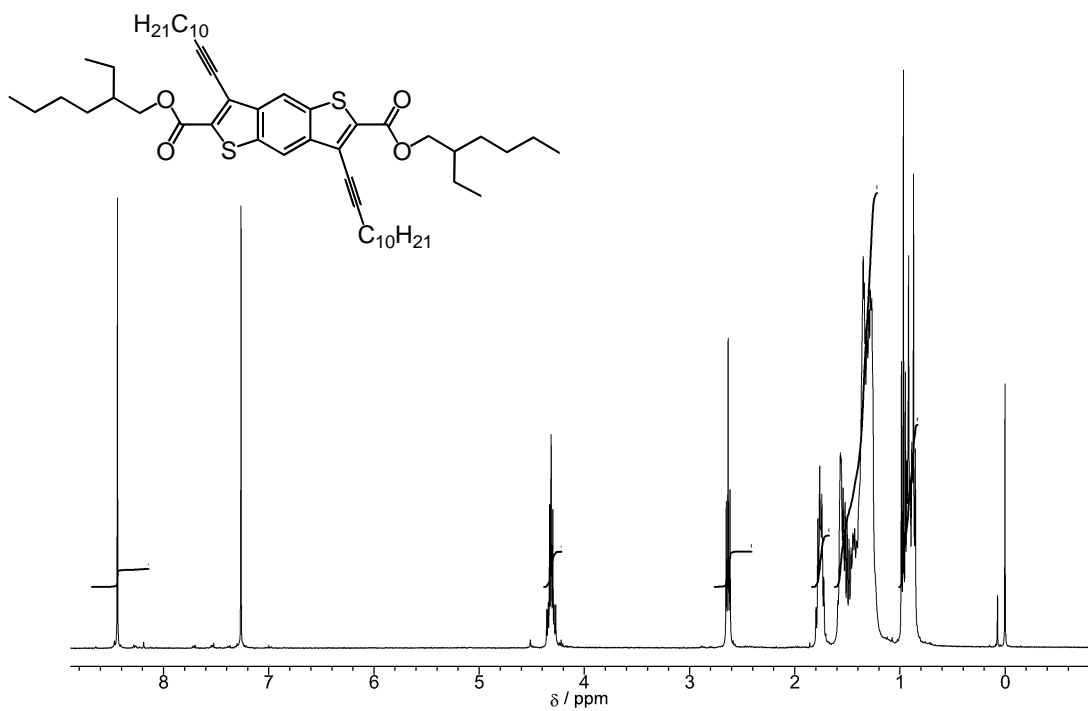

| No. | ppm    | Hz      | Height |
|-----|--------|---------|--------|
| 1   | 162.28 | 16311.8 | 20.05  |
| 2   | 140.60 | 14132.3 | 13.64  |
| 3   | 137.03 | 13773.8 | 13.87  |
| 4   | 135.52 | 13621.4 | 11.43  |
| 5   | 123.23 | 12386.9 | 8.15   |
| 6   | 118.82 | 11943.2 | 18.22  |
| 7   | 101.45 | 10196.8 | 12.02  |
| 8   | 73.96  | 7434.5  | 12.99  |
| 9   | 68.12  | 6847.0  | 20.14  |
| 10  | 38.96  | 3916.0  | 26.64  |
| 11  | 32.01  | 3217.3  | 38.77  |
| 12  | 30.54  | 3069.7  | 31.47  |
| 13  | 29.71  | 2986.3  | 55.55  |
| 14  | 29.44  | 2959.4  | 60.73  |
| 15  | 29.31  | 2946.0  | 42.65  |
| 16  | 29.26  | 2941.2  | 44.89  |
| 17  | 29.09  | 2924.0  | 50.18  |
| 18  | 28.86  | 2901.0  | 40.52  |
| 19  | 23.96  | 2408.3  | 34.24  |
| 20  | 23.11  | 2323.0  | 34.04  |
| 21  | 22.79  | 2290.4  | 34.93  |
| 22  | 20.26  | 2036.4  | 30.63  |
| 23  | 14.22  | 1429.7  | 62.90  |
| 24  | 14.19  | 1425.9  | 40.80  |
| 25  | 11.21  | 1126.9  | 30.65  |

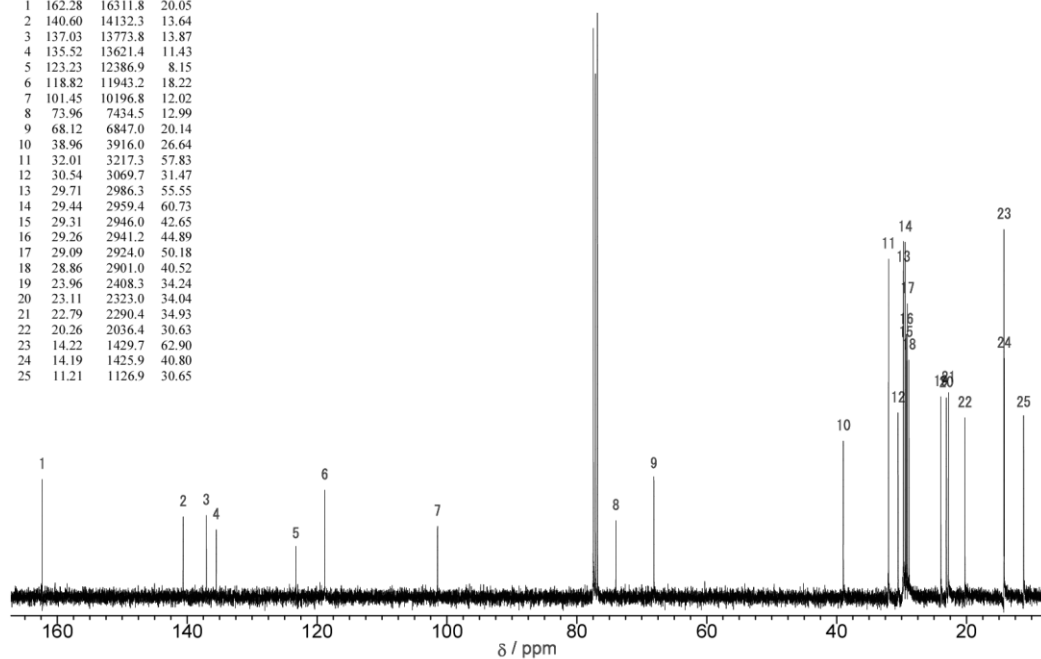

[  $^1\text{H}$  and  $^{13}\text{C}$  NMR Spectra of **9** ]

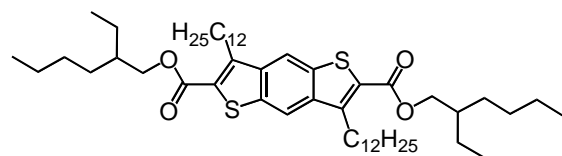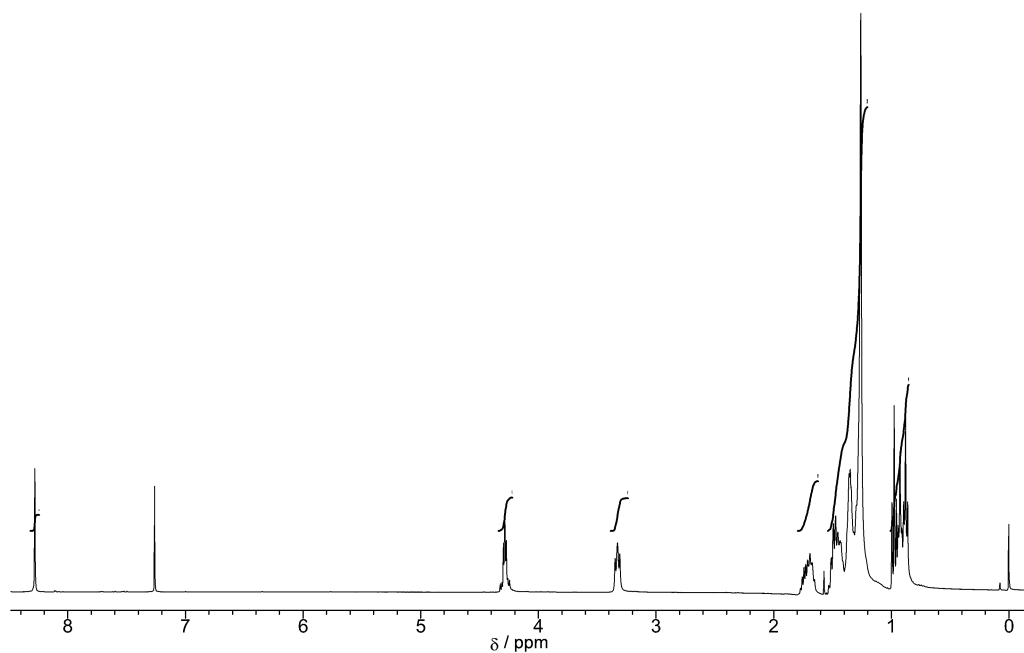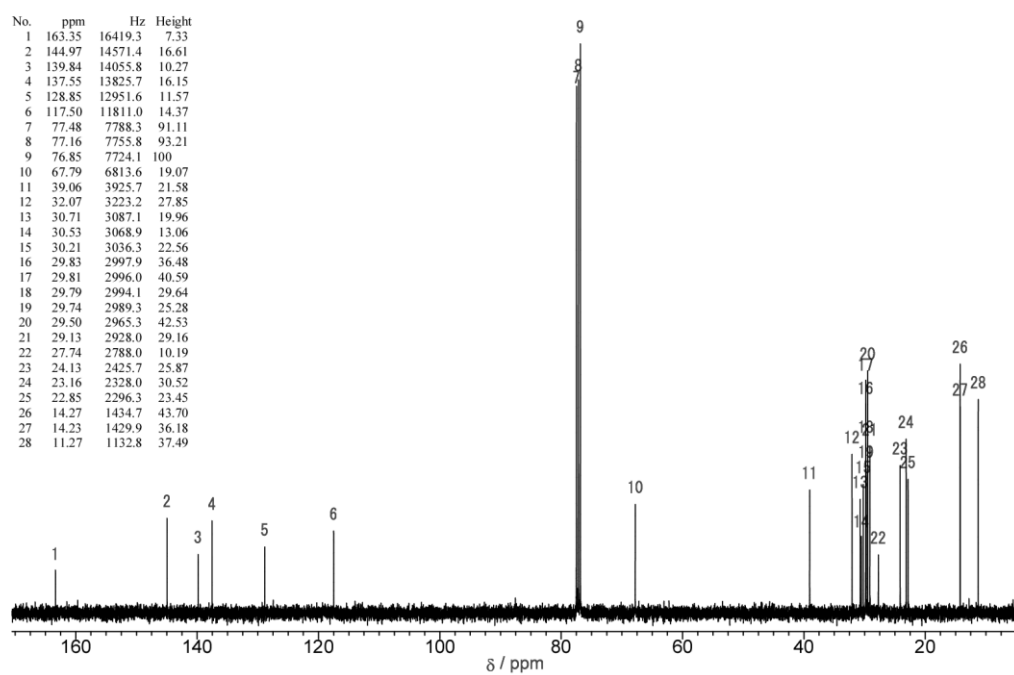

[  $^1\text{H}$  NMR Spectrum of **10** ]

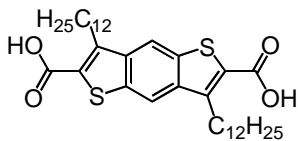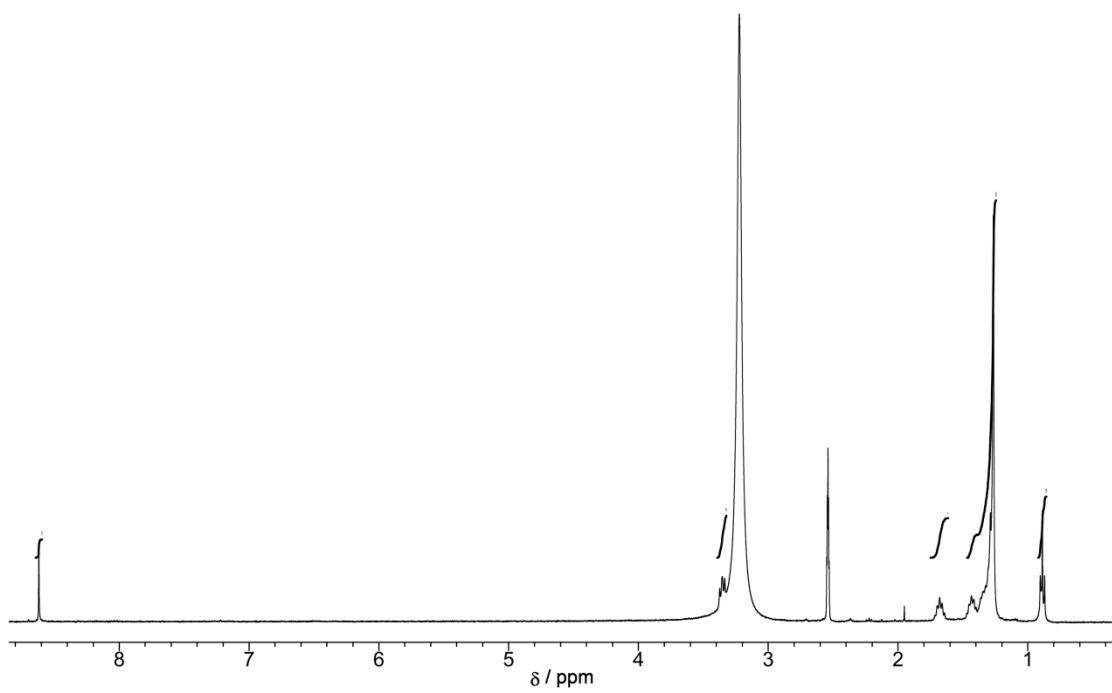

[<sup>1</sup>H and <sup>13</sup>C NMR Spectra of **1a**]

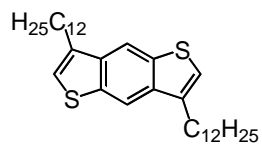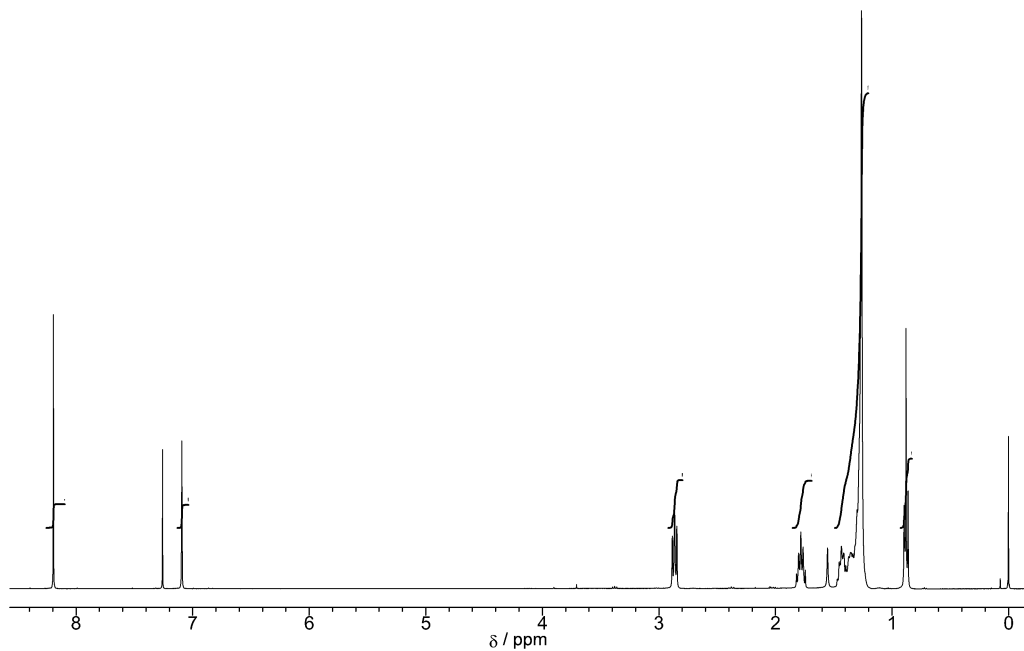

| No. | ppm    | Hz      | Height |
|-----|--------|---------|--------|
| 1   | 137.71 | 13842.0 | 8.20   |
| 2   | 137.22 | 13793.1 | 6.65   |
| 3   | 136.29 | 13699.2 | 6.79   |
| 4   | 121.43 | 12205.9 | 18.26  |
| 5   | 115.52 | 11611.7 | 19.23  |
| 6   | 32.08  | 3224.1  | 27.84  |
| 7   | 29.83  | 2997.9  | 29.82  |
| 8   | 29.79  | 2994.1  | 42.63  |
| 9   | 29.66  | 2981.6  | 23.60  |
| 10  | 29.51  | 2966.3  | 31.09  |
| 11  | 29.16  | 2930.8  | 12.93  |
| 12  | 28.91  | 2905.9  | 15.04  |
| 13  | 22.85  | 2296.3  | 21.81  |
| 14  | 14.28  | 1435.6  | 18.29  |

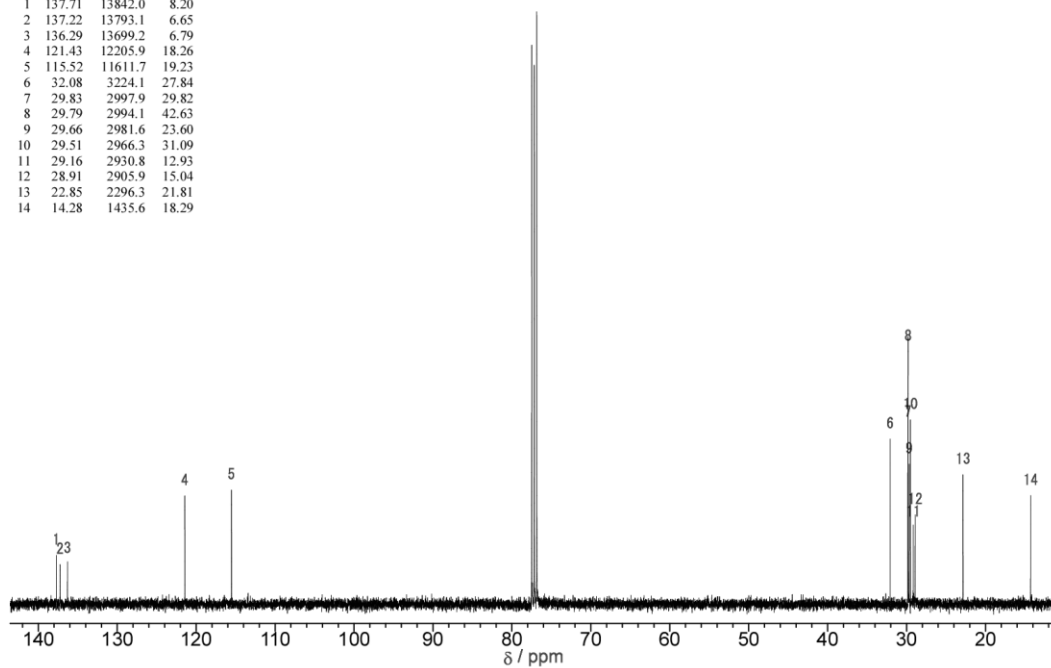



[<sup>1</sup>H and <sup>13</sup>C NMR Spectra of 11]

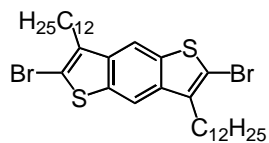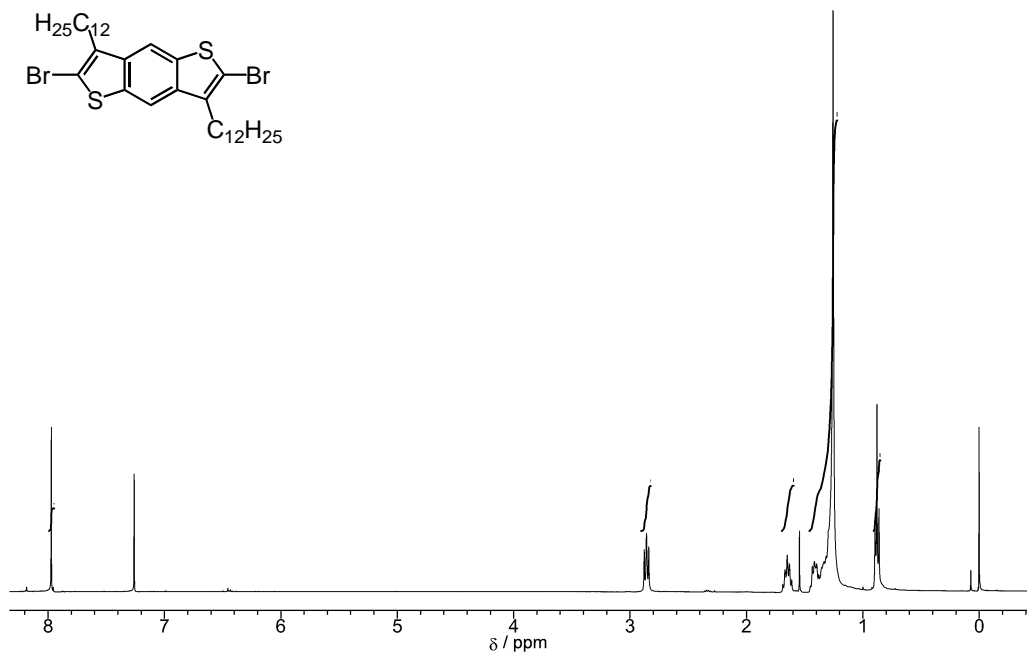

| No. | ppm    | Hz      | Height |
|-----|--------|---------|--------|
| 1   | 137.30 | 13800.8 | 14.86  |
| 2   | 136.04 | 13674.3 | 13.16  |
| 3   | 135.69 | 13638.8 | 14.30  |
| 4   | 114.47 | 11506.2 | 14.16  |
| 5   | 112.87 | 11345.2 | 10.14  |
| 6   | 32.07  | 3223.2  | 15.54  |
| 7   | 29.82  | 2997.0  | 28.40  |
| 8   | 29.80  | 2995.1  | 20.95  |
| 9   | 29.78  | 2993.1  | 30.20  |
| 10  | 29.74  | 2989.3  | 20.38  |
| 11  | 29.70  | 2985.5  | 18.86  |
| 12  | 29.63  | 2977.8  | 21.83  |
| 13  | 29.50  | 2965.3  | 25.17  |
| 14  | 29.02  | 2916.5  | 14.88  |
| 15  | 28.08  | 2822.5  | 10.52  |
| 16  | 22.85  | 2296.3  | 30.73  |
| 17  | 14.28  | 1435.6  | 30.21  |

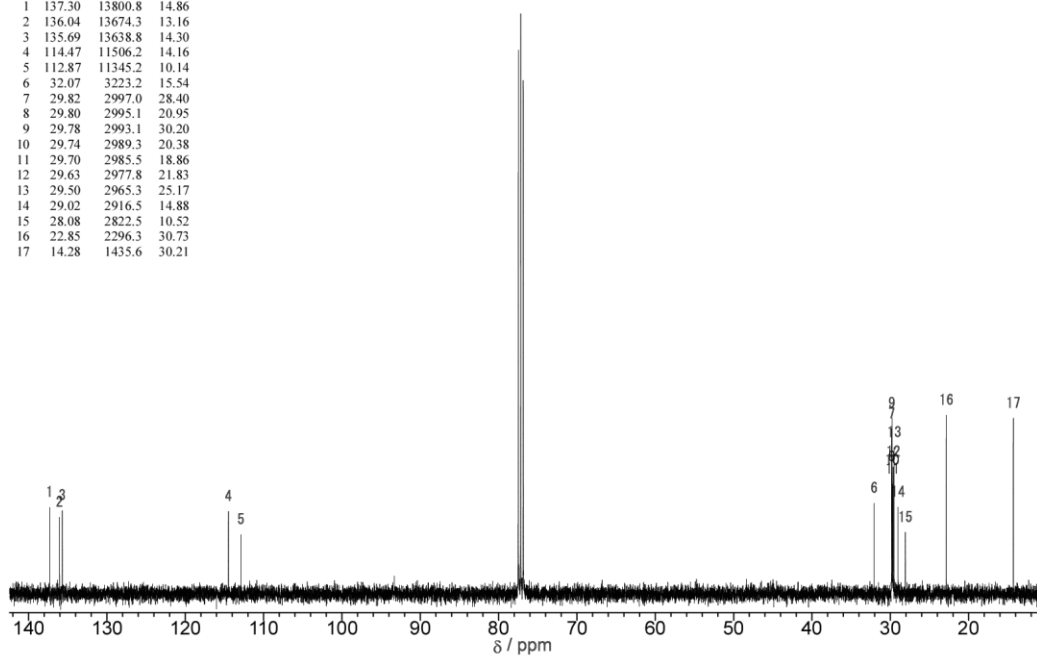

<sup>1</sup>H NMR Spectrum of **2a**]

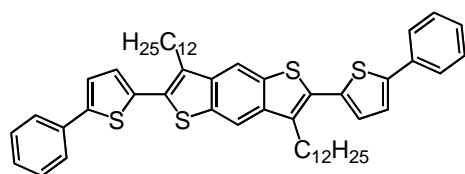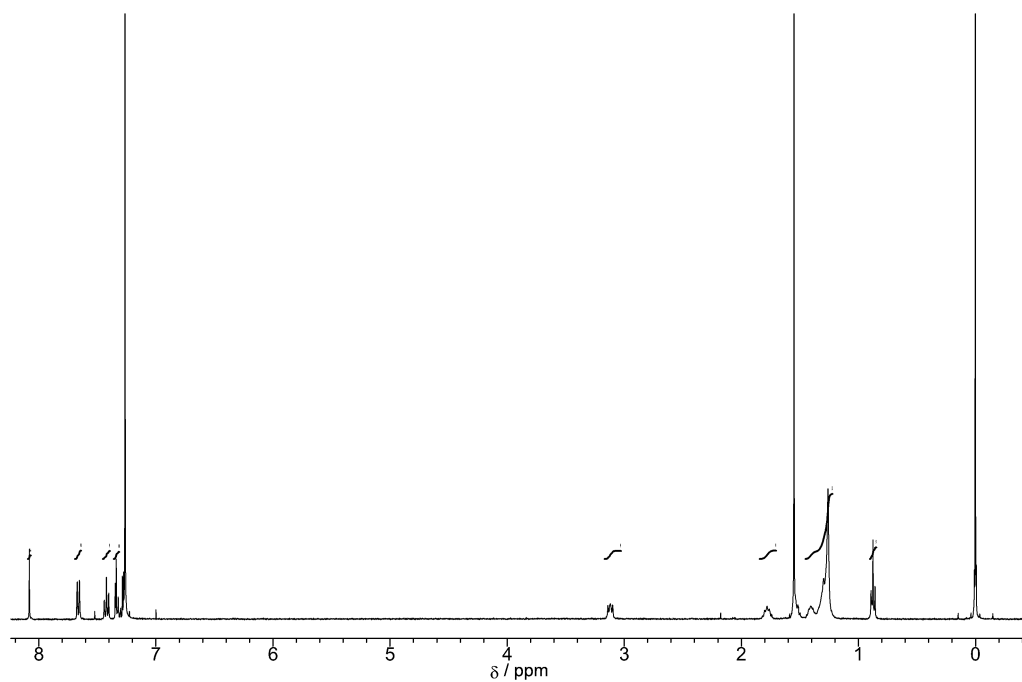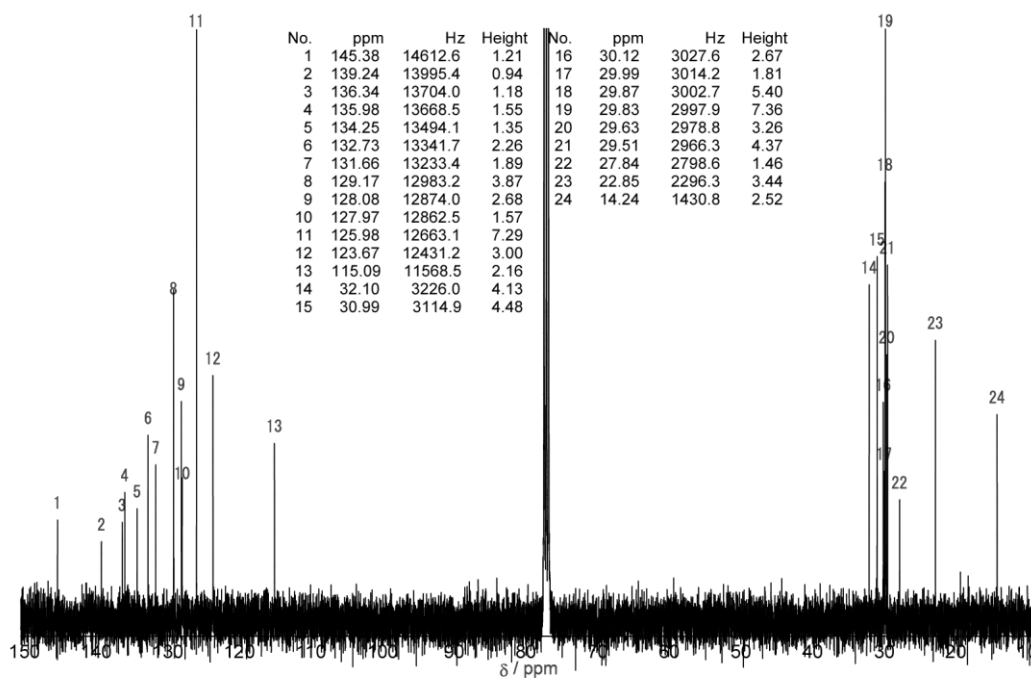

[<sup>1</sup>H and <sup>13</sup>C NMR Spectra of **12**]

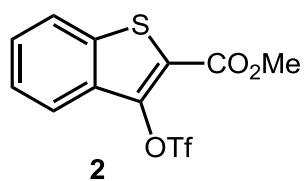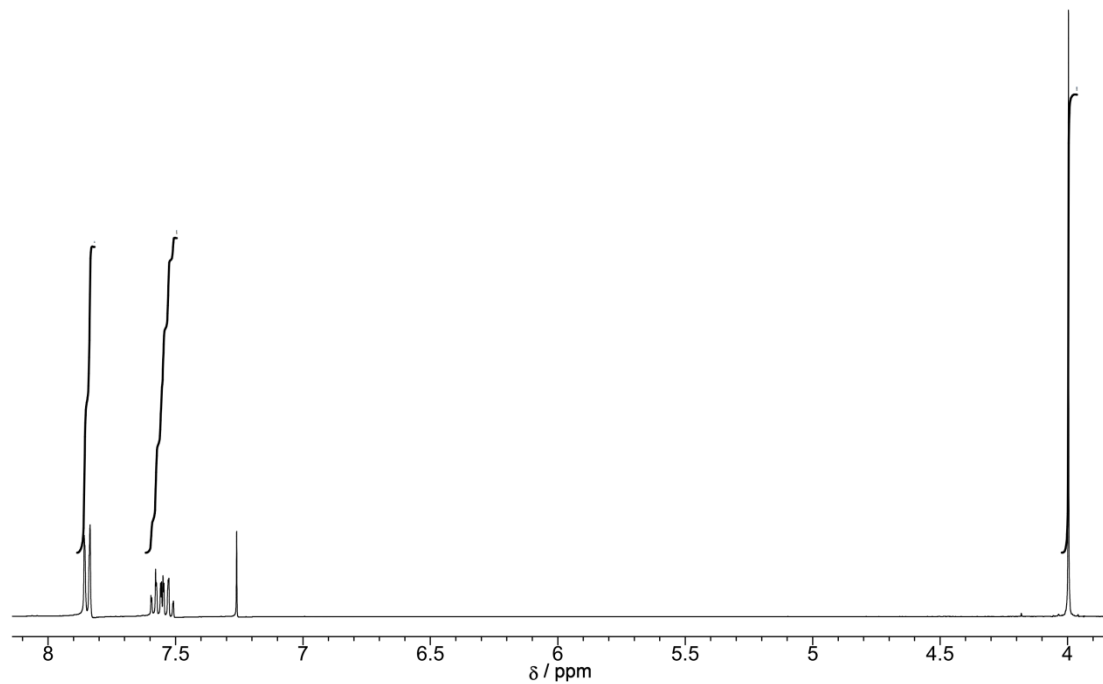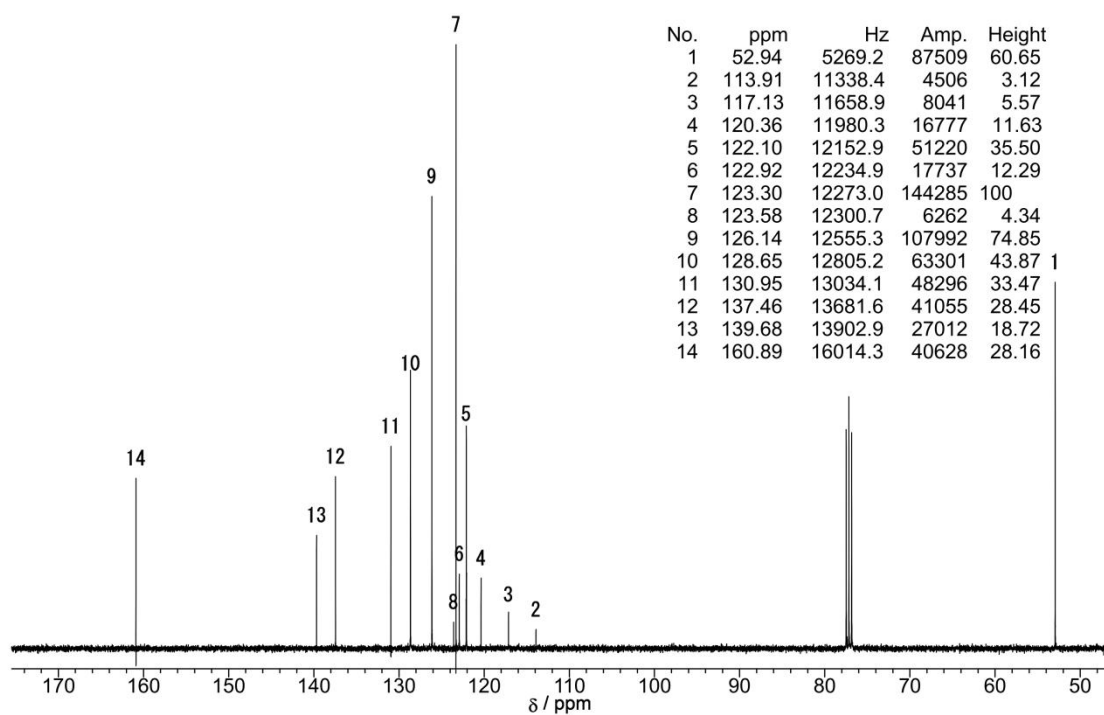

[<sup>1</sup>H and <sup>13</sup>C NMR Spectra of **13**]

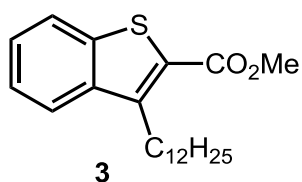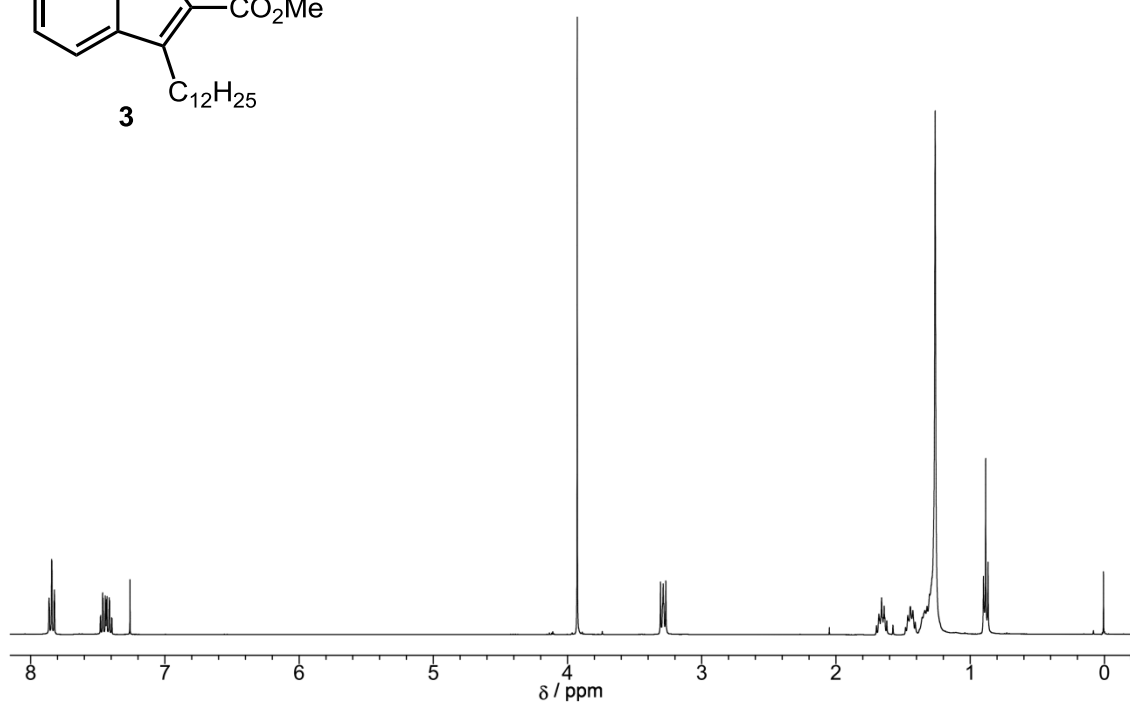

| No. | ppm    | Hz      | Amp.  | Height |
|-----|--------|---------|-------|--------|
| 1   | 14.27  | 1434.7  | 47798 | 74.20  |
| 2   | 22.84  | 2295.4  | 22159 | 34.40  |
| 3   | 27.53  | 2766.9  | 21916 | 34.02  |
| 4   | 29.50  | 2965.3  | 45056 | 69.95  |
| 5   | 29.65  | 2980.7  | 22513 | 34.95  |
| 6   | 29.77  | 2992.2  | 38365 | 59.56  |
| 7   | 29.79  | 2994.1  | 28346 | 44.00  |
| 8   | 29.81  | 2996.0  | 25516 | 39.61  |
| 9   | 29.83  | 2997.9  | 50566 | 78.50  |
| 10  | 30.09  | 3024.8  | 39572 | 61.43  |
| 11  | 30.45  | 3060.2  | 22614 | 35.11  |
| 12  | 32.07  | 3223.2  | 31099 | 48.28  |
| 13  | 52.22  | 5248.4  | 19475 | 30.23  |
| 14  | 122.86 | 12349.7 | 39037 | 60.60  |
| 15  | 123.88 | 12452.2 | 37137 | 57.65  |
| 16  | 124.51 | 12515.5 | 21768 | 33.79  |
| 17  | 126.29 | 12693.8 | 13070 | 20.29  |
| 18  | 127.22 | 12787.7 | 28231 | 43.83  |
| 19  | 139.71 | 14043.3 | 9610  | 14.92  |
| 20  | 140.87 | 14159.3 | 16837 | 26.14  |
| 21  | 146.75 | 14750.6 | 9556  | 14.83  |
| 22  | 163.74 | 16458.6 | 5993  | 9.30   |

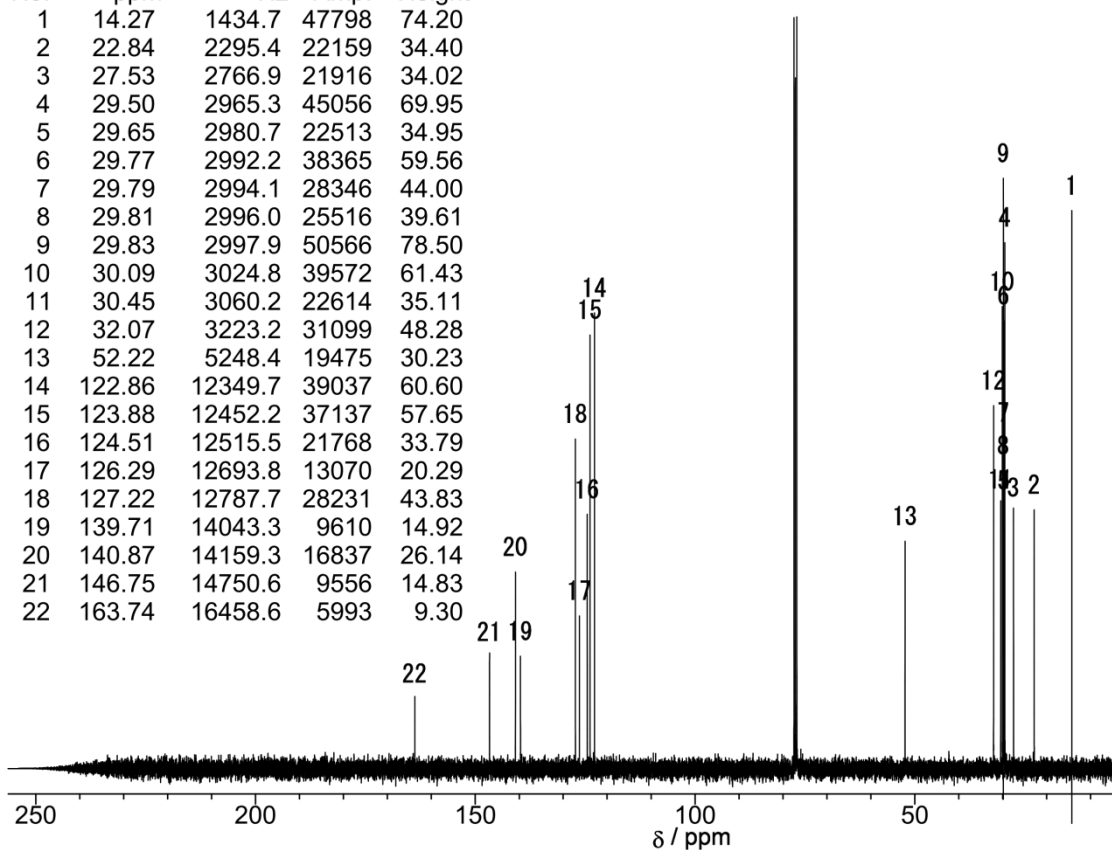

[<sup>1</sup>H and <sup>13</sup>C NMR Spectra of **14**]

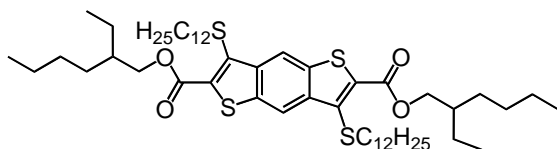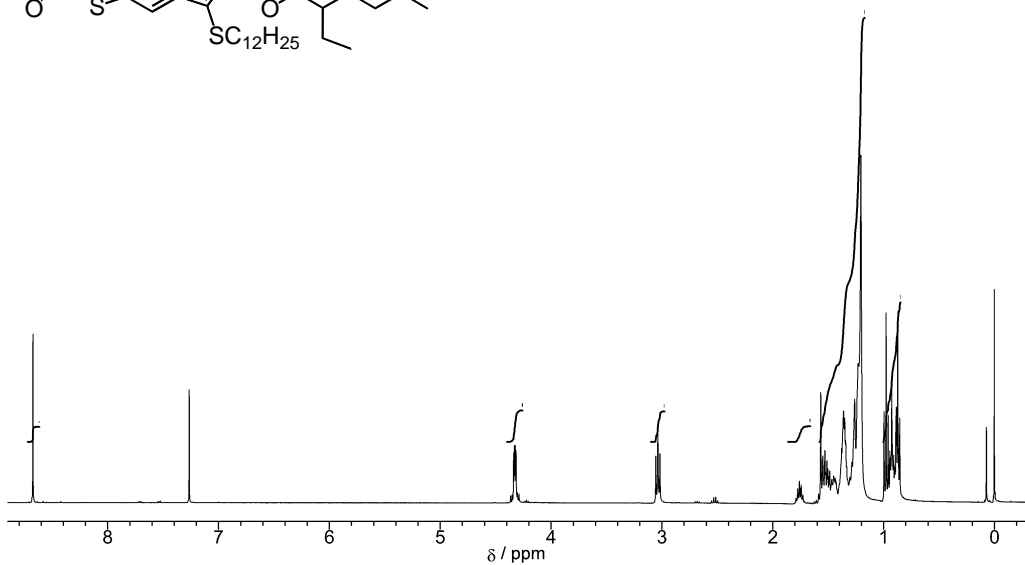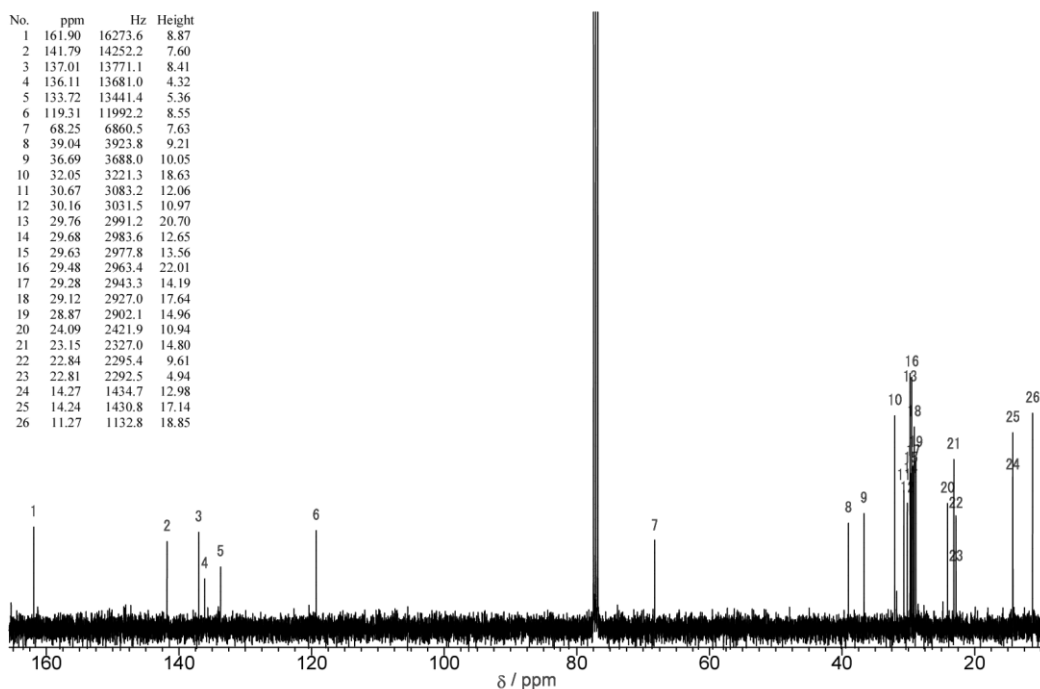

[  $^1\text{H}$  NMR Spectrum of **16** ]

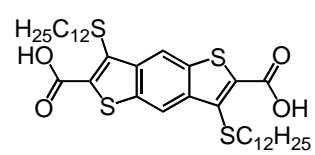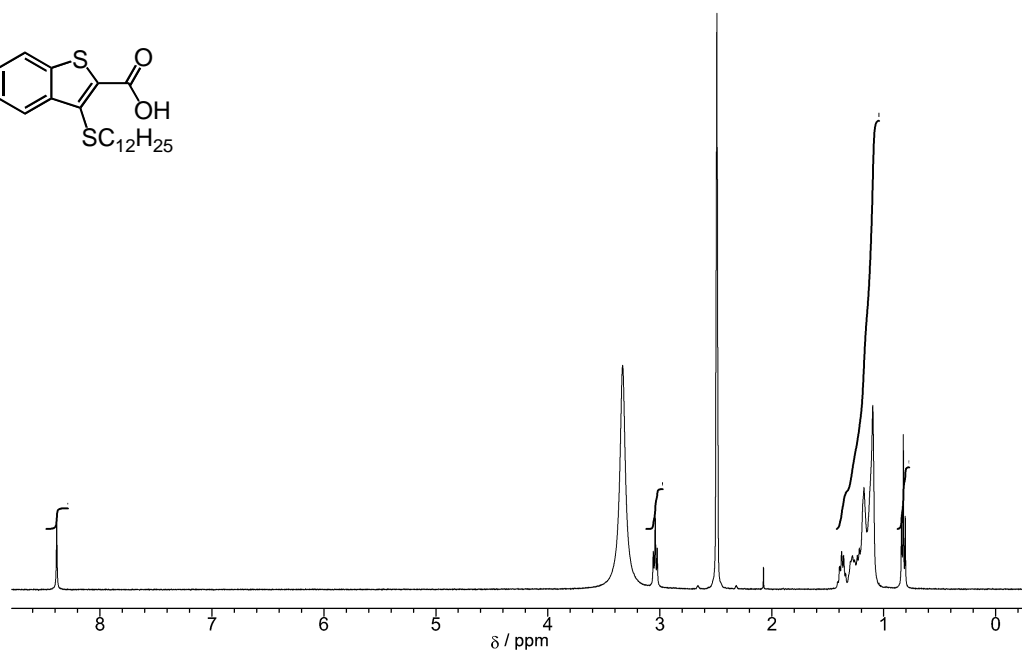

[<sup>1</sup>H and <sup>13</sup>C NMR Spectra of **1b**]

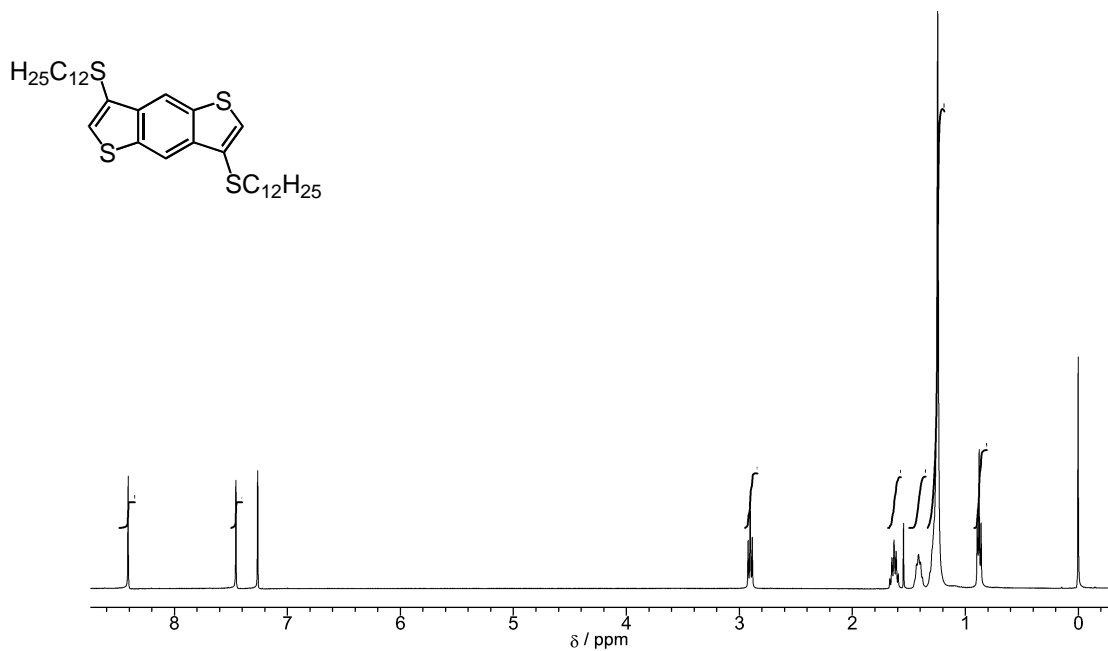

| No. | ppm    | Hz      | Height |
|-----|--------|---------|--------|
| 1   | 137.57 | 13827.6 | 5.84   |
| 2   | 137.53 | 13823.8 | 5.63   |
| 3   | 127.92 | 12857.7 | 8.33   |
| 4   | 126.36 | 12701.4 | 6.91   |
| 5   | 116.73 | 11733.4 | 7.16   |
| 6   | 35.02  | 3520.3  | 9.47   |
| 7   | 32.06  | 3222.2  | 13.31  |
| 8   | 29.78  | 2993.1  | 15.18  |
| 9   | 29.72  | 2987.4  | 11.14  |
| 10  | 29.69  | 2984.5  | 7.28   |
| 11  | 29.65  | 2980.7  | 12.65  |
| 12  | 29.49  | 2964.4  | 12.38  |
| 13  | 29.32  | 2947.1  | 12.84  |
| 14  | 28.80  | 2894.4  | 11.50  |
| 15  | 22.84  | 2295.4  | 9.30   |
| 16  | 14.28  | 1435.6  | 10.35  |

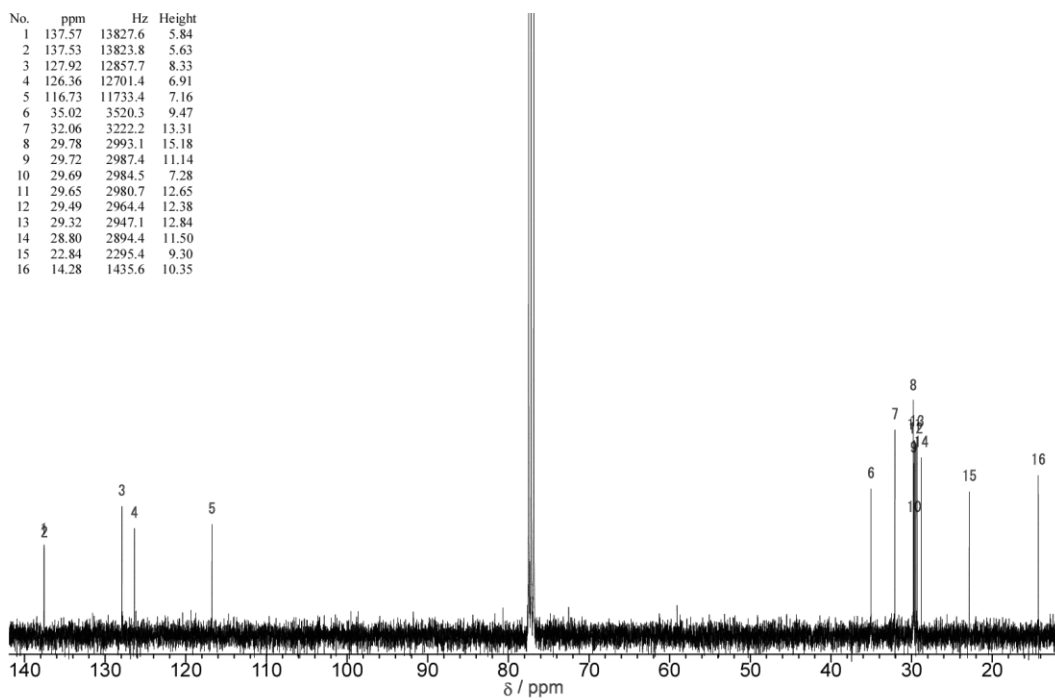

[  $^1\text{H}$  and  $^{13}\text{C}$  NMR Spectra of **18** ]

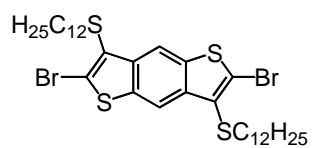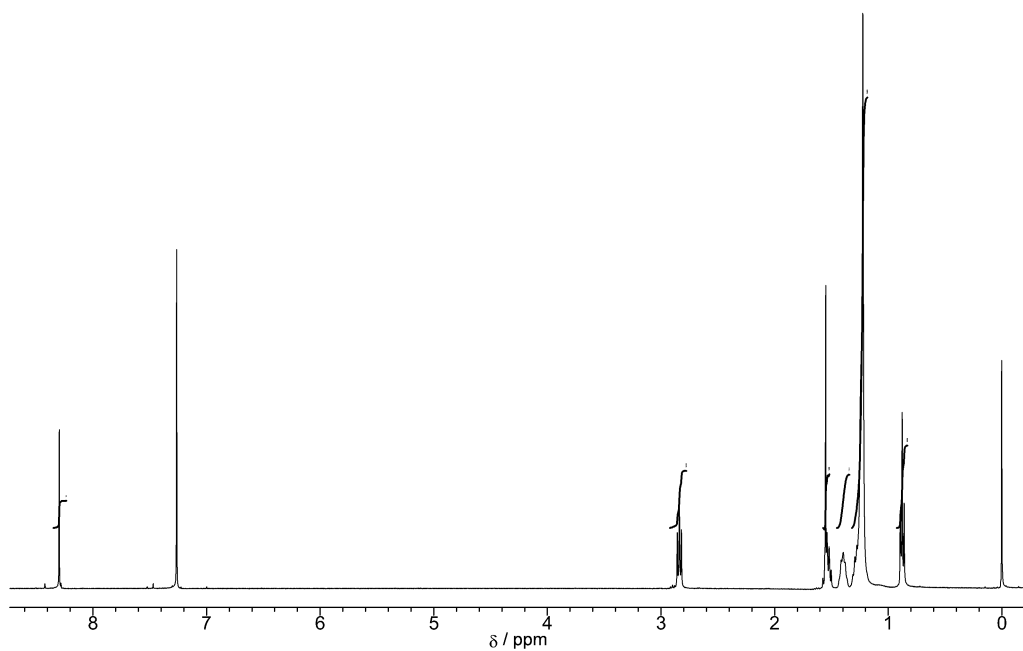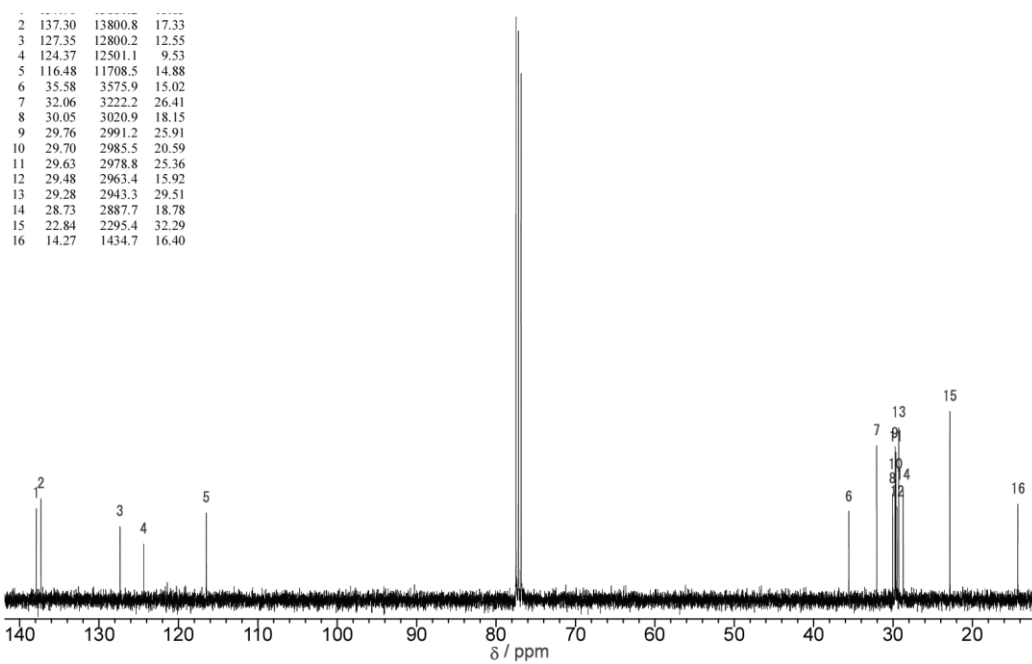



[<sup>1</sup>H and <sup>13</sup>C NMR Spectra of **2b**]

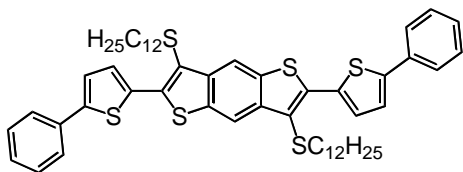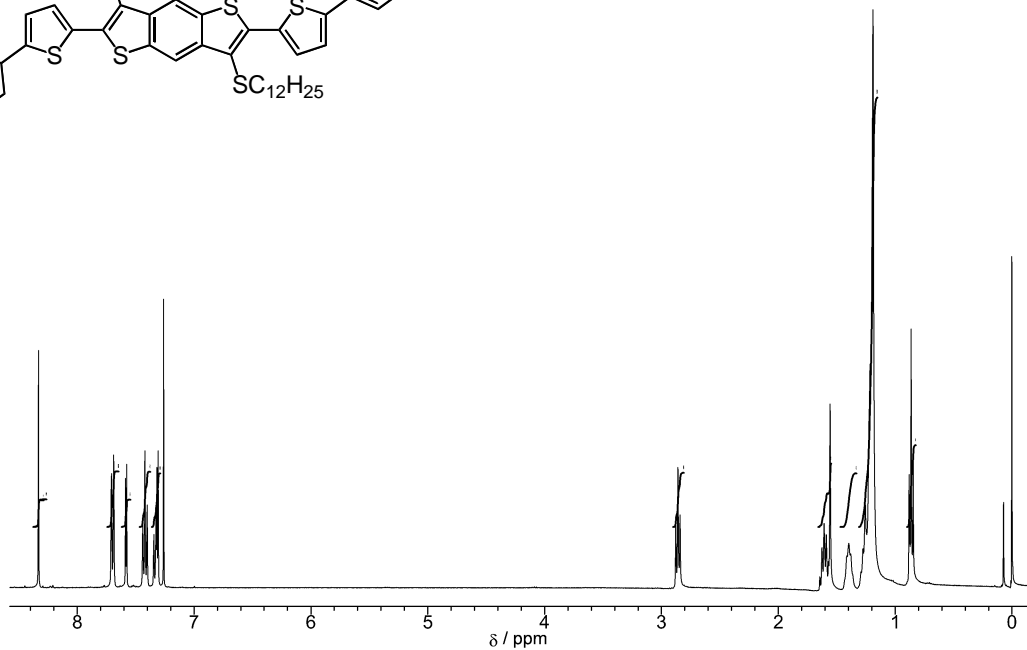

| No. | ppm    | Hz      | Height |
|-----|--------|---------|--------|
| 1   | 146.80 | 14755.4 | 5.00   |
| 2   | 141.93 | 14266.6 | 3.77   |
| 3   | 140.93 | 14166.0 | 3.82   |
| 4   | 135.20 | 13589.9 | 3.74   |
| 5   | 135.13 | 13582.3 | 6.23   |
| 6   | 134.20 | 13489.3 | 3.61   |
| 7   | 129.32 | 12998.6 | 5.42   |
| 8   | 129.13 | 12979.4 | 12.80  |
| 9   | 128.08 | 12874.0 | 3.46   |
| 10  | 126.03 | 12667.9 | 15.32  |
| 11  | 122.87 | 12350.6 | 4.26   |
| 12  | 120.70 | 12132.1 | 2.76   |
| 13  | 116.33 | 11693.1 | 5.29   |
| 14  | 36.52  | 3670.8  | 4.99   |
| 15  | 32.06  | 3222.2  | 11.02  |
| 16  | 30.01  | 3016.1  | 6.16   |
| 17  | 29.80  | 2995.1  | 5.44   |
| 18  | 29.76  | 2991.2  | 12.20  |
| 19  | 29.74  | 2989.3  | 13.21  |
| 20  | 29.72  | 2987.4  | 12.53  |
| 21  | 29.49  | 2964.4  | 10.14  |
| 22  | 29.37  | 2951.9  | 9.68   |
| 23  | 29.02  | 2917.4  | 7.70   |
| 24  | 22.84  | 2295.4  | 6.60   |
| 25  | 14.27  | 1434.7  | 11.92  |

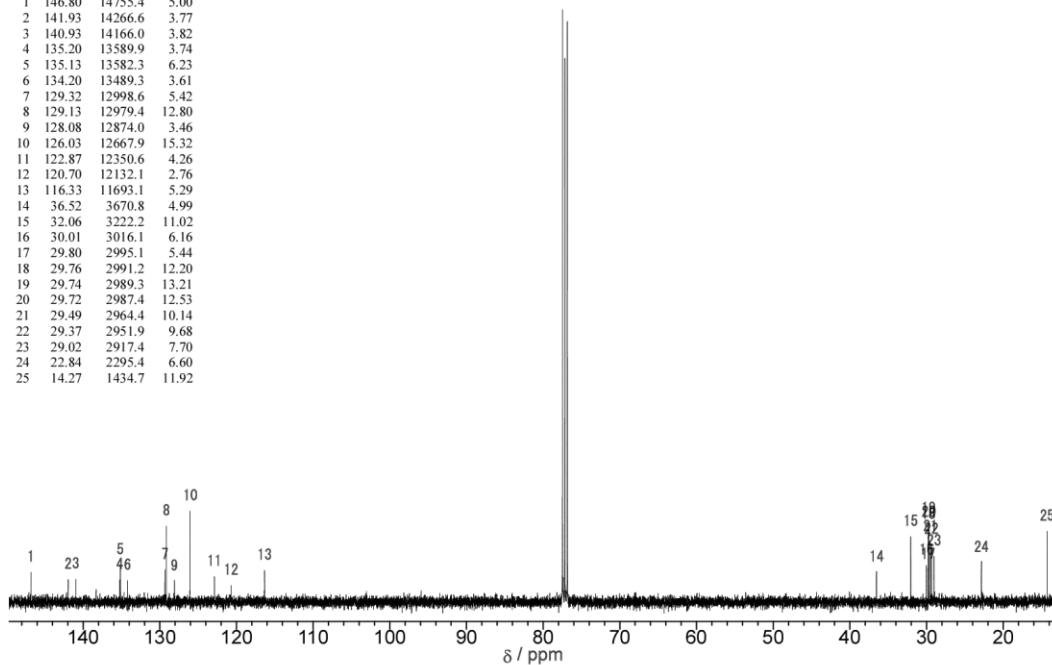

[<sup>1</sup>H and <sup>13</sup>C NMR Spectra of **15**]

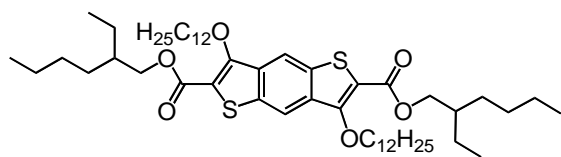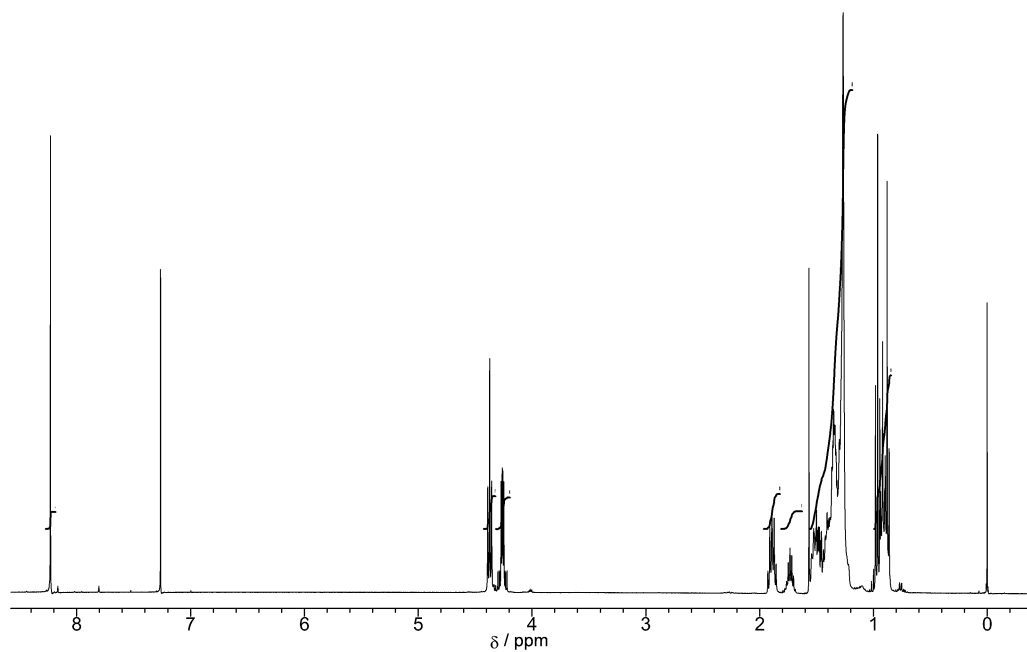

| No. | ppm    | Hz      | Height |
|-----|--------|---------|--------|
| 1   | 161.93 | 16276.5 | 18.13  |
| 2   | 155.12 | 15592.2 | 12.33  |
| 3   | 135.19 | 13589.0 | 7.47   |
| 4   | 134.45 | 13514.2 | 12.25  |
| 5   | 117.19 | 11779.4 | 15.12  |
| 6   | 117.03 | 11763.1 | 6.32   |
| 7   | 76.19  | 7658.0  | 17.87  |
| 8   | 67.82  | 6816.5  | 14.21  |
| 9   | 39.01  | 3920.9  | 20.19  |
| 10  | 32.06  | 3222.2  | 23.28  |
| 11  | 30.61  | 3076.5  | 25.09  |
| 12  | 30.56  | 3071.7  | 16.74  |
| 13  | 29.81  | 2996.0  | 39.93  |
| 14  | 29.78  | 2993.1  | 35.30  |
| 15  | 29.76  | 2991.2  | 45.38  |
| 16  | 29.74  | 2989.3  | 34.97  |
| 17  | 29.61  | 2975.9  | 28.93  |
| 18  | 29.50  | 2965.3  | 42.99  |
| 19  | 29.09  | 2924.1  | 34.02  |
| 20  | 26.06  | 2619.3  | 21.97  |
| 21  | 24.02  | 2414.2  | 23.19  |
| 22  | 23.15  | 2327.0  | 21.94  |
| 23  | 22.84  | 2295.4  | 35.25  |
| 24  | 14.27  | 1434.7  | 42.09  |
| 25  | 14.23  | 1429.9  | 36.96  |
| 26  | 11.22  | 1128.0  | 21.81  |

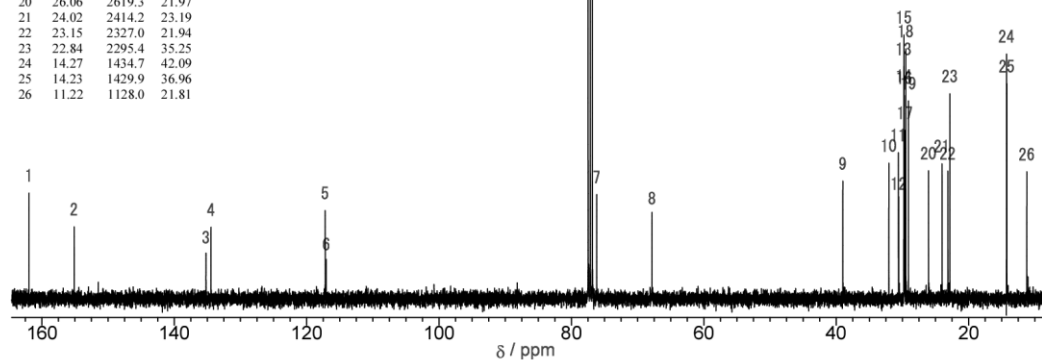

[ <sup>1</sup>H

### NMR Spectrum of 17]

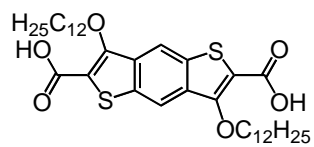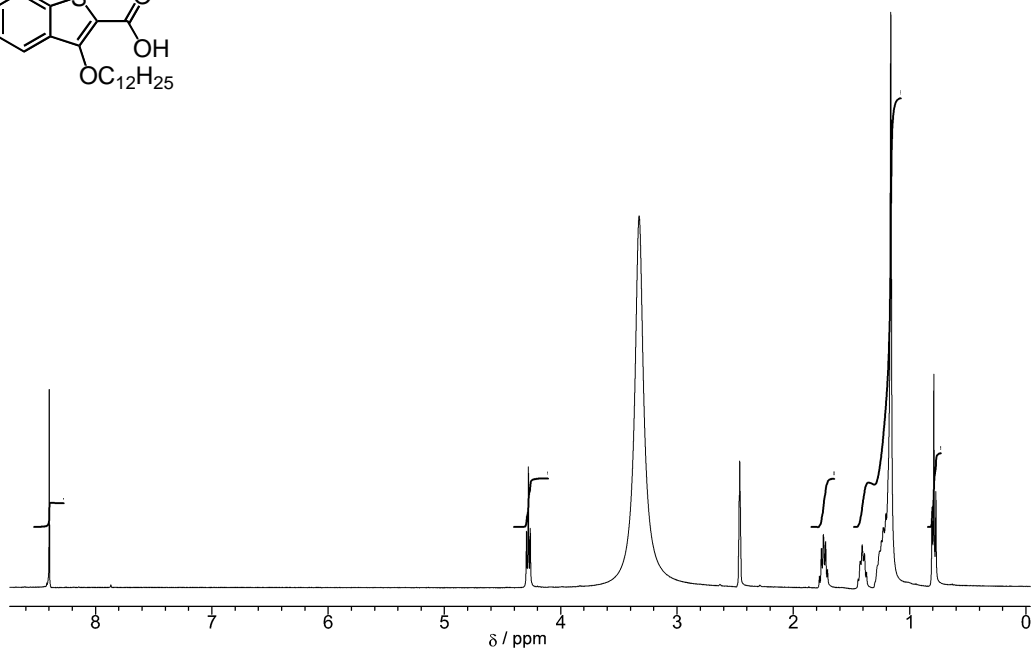

[  $^1\text{H}$  and  $^{13}\text{C}$  NMR Spectra of **1c** ]

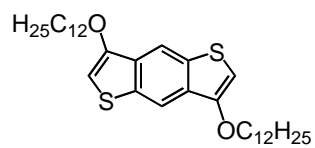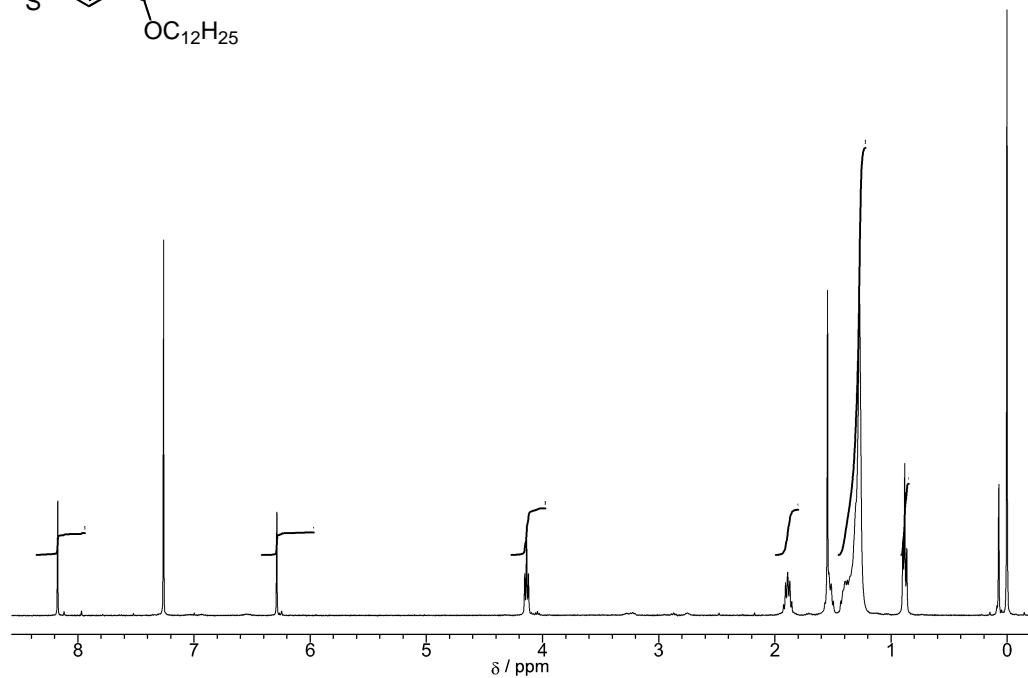

| No. | ppm    | Hz      | Height |
|-----|--------|---------|--------|
| 1   | 137.90 | 13861.2 | 15.63  |
| 2   | 137.30 | 13800.8 | 17.33  |
| 3   | 127.35 | 12800.2 | 12.55  |
| 4   | 124.37 | 12501.1 | 9.53   |
| 5   | 116.48 | 11708.5 | 14.88  |
| 6   | 35.58  | 3575.9  | 15.02  |
| 7   | 32.06  | 3222.2  | 26.41  |
| 8   | 30.05  | 3020.9  | 18.15  |
| 9   | 29.76  | 2991.2  | 25.91  |
| 10  | 29.70  | 2985.5  | 20.59  |
| 11  | 29.63  | 2978.8  | 25.36  |
| 12  | 29.48  | 2963.4  | 15.92  |
| 13  | 29.28  | 2943.3  | 29.51  |
| 14  | 28.73  | 2887.7  | 18.78  |
| 15  | 22.84  | 2295.4  | 32.29  |
| 16  | 14.27  | 1434.7  | 16.40  |

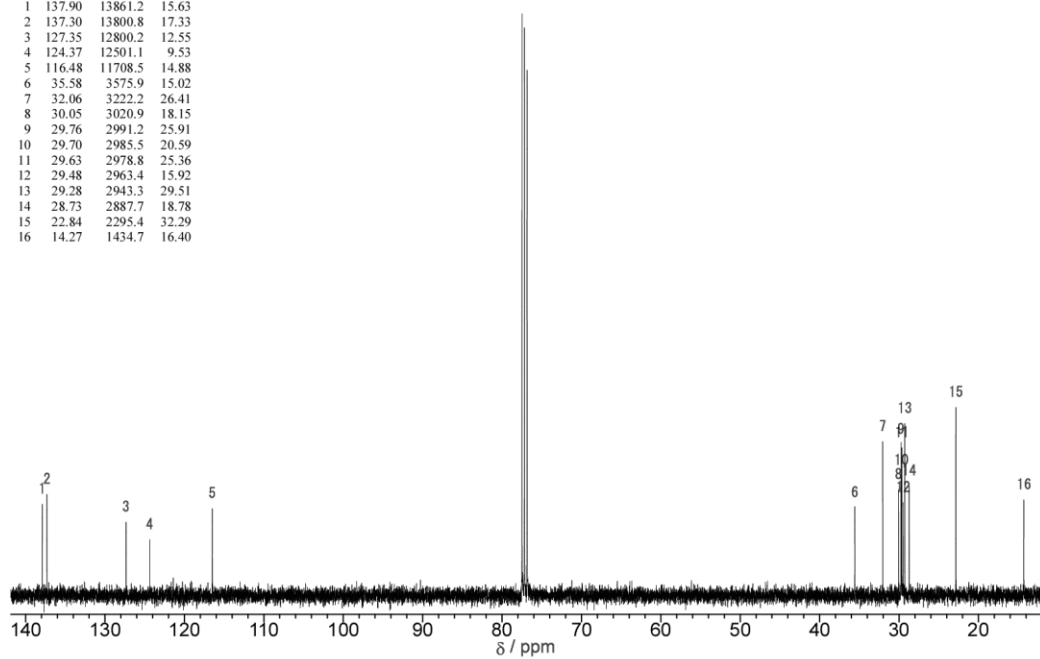

[<sup>1</sup>H and <sup>13</sup>C NMR Spectra of **19**]

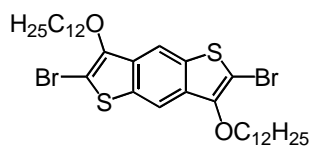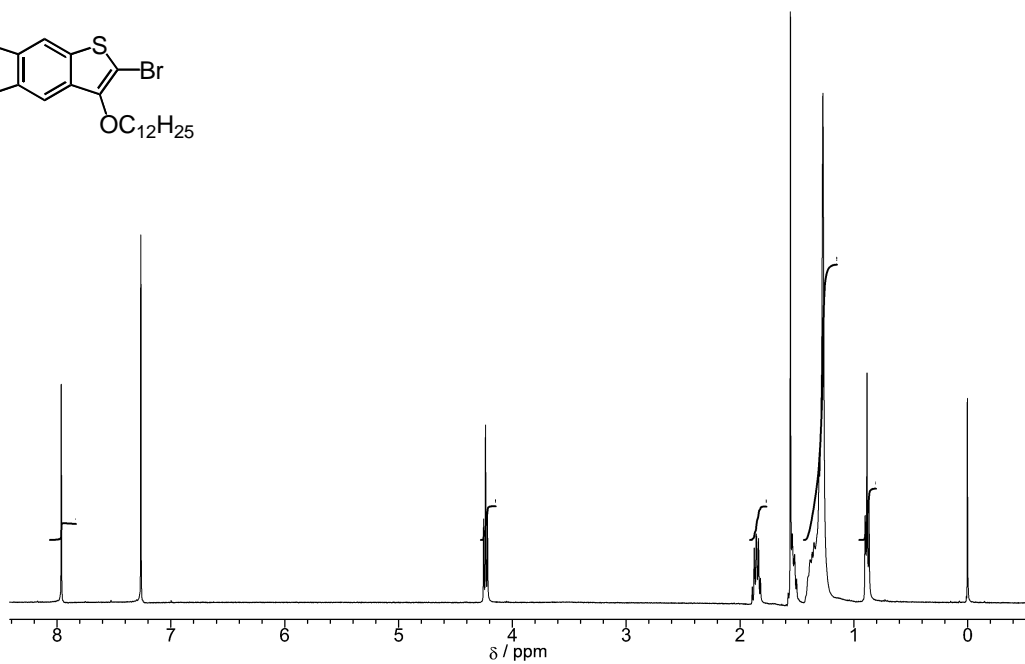

| No. | ppm    | Hz      | Height |
|-----|--------|---------|--------|
| 1   | 148.07 | 14882.9 | 20.46  |
| 2   | 134.33 | 13501.8 | 16.24  |
| 3   | 131.36 | 13203.7 | 19.33  |
| 4   | 113.93 | 11451.6 | 23.98  |
| 5   | 100.58 | 10109.8 | 12.38  |
| 6   | 74.24  | 7462.5  | 24.75  |
| 7   | 32.08  | 3224.1  | 47.12  |
| 8   | 30.42  | 3057.4  | 35.48  |
| 9   | 29.83  | 2997.9  | 32.52  |
| 10  | 29.80  | 2995.1  | 47.77  |
| 11  | 29.77  | 2992.2  | 34.60  |
| 12  | 29.75  | 2990.3  | 41.18  |
| 13  | 29.56  | 2971.1  | 20.53  |
| 14  | 29.51  | 2966.3  | 21.53  |
| 15  | 26.08  | 2621.3  | 40.42  |
| 16  | 22.86  | 2297.3  | 21.05  |
| 17  | 14.28  | 1435.6  | 38.75  |

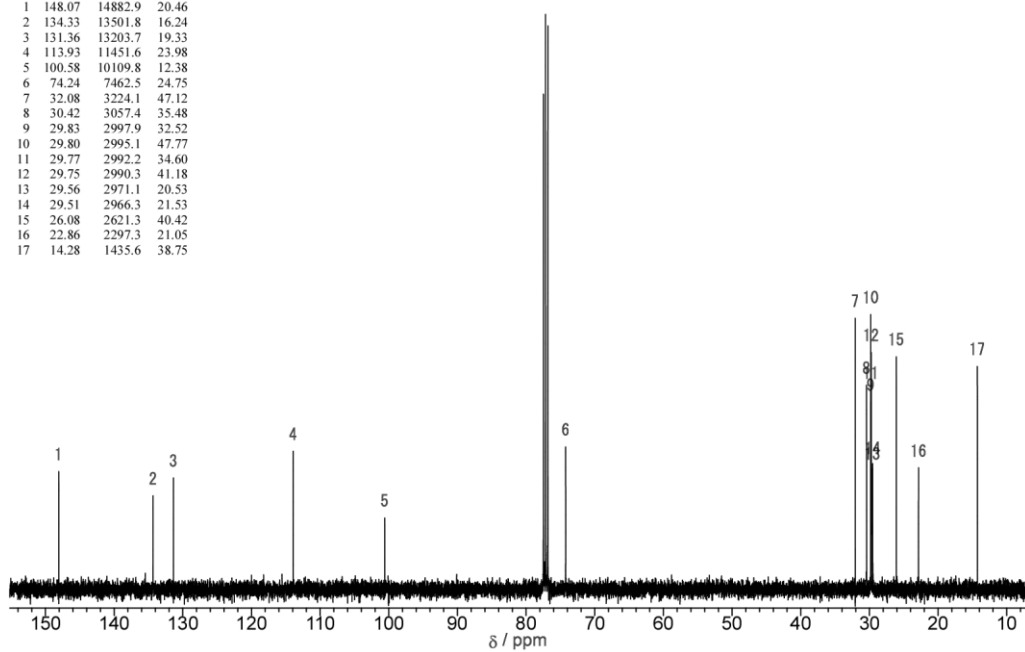

[<sup>1</sup>H NMR Spectrum of **2c**]

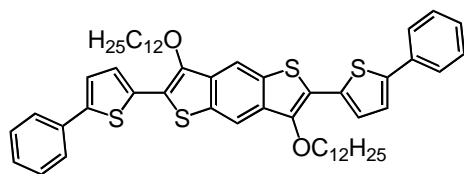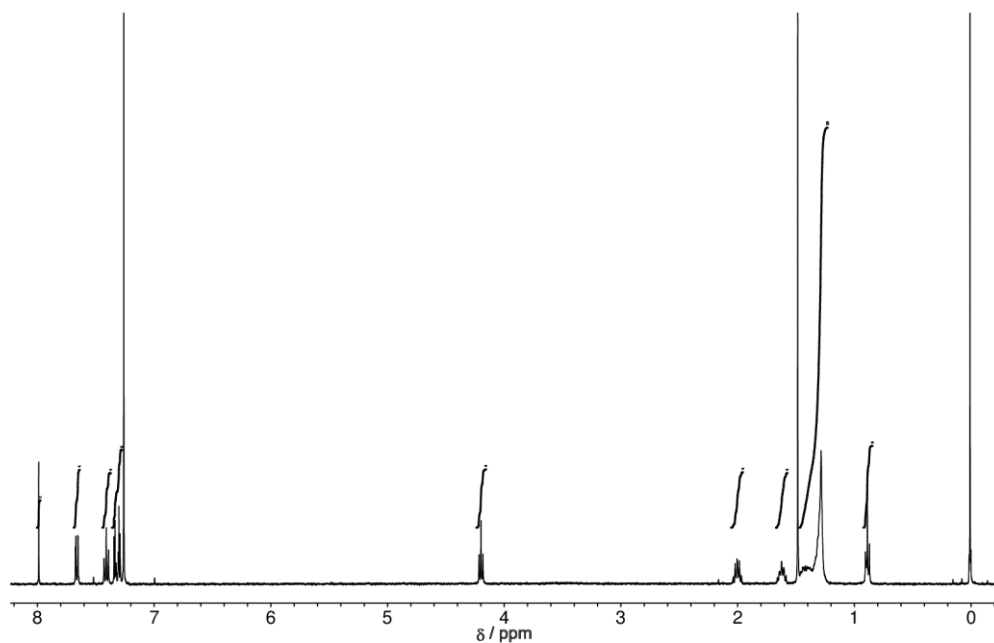

| No. | ppm    | Hz      | Height | No. | ppm   | Hz     | Height |
|-----|--------|---------|--------|-----|-------|--------|--------|
| 1   | 145.23 | 14597.4 | 0.34   | 16  | 29.69 | 2984.7 | 0.86   |
| 2   | 144.95 | 14569.7 | 0.30   | 17  | 29.61 | 2976.0 | 0.53   |
| 3   | 134.47 | 13516.3 | 0.22   | 18  | 29.39 | 2954.0 | 0.34   |
| 4   | 134.32 | 13501.0 | 0.30   | 19  | 26.22 | 2635.8 | 0.37   |
| 5   | 132.82 | 13350.5 | 0.32   | 20  | 22.71 | 2283.1 | 0.72   |
| 6   | 129.02 | 12968.1 | 0.76   | 21  | 14.10 | 1417.6 | 0.49   |
| 7   | 127.75 | 12840.6 | 0.34   |     |       |        |        |
| 8   | 126.37 | 12702.6 | 0.30   |     |       |        |        |
| 9   | 125.82 | 12647.0 | 0.79   |     |       |        |        |
| 10  | 117.42 | 11802.6 | 0.22   |     |       |        |        |
| 11  | 73.87  | 7425.2  | 0.40   |     |       |        |        |
| 12  | 31.96  | 3212.8  | 0.37   |     |       |        |        |
| 13  | 30.60  | 3075.7  | 0.43   |     |       |        |        |
| 14  | 29.74  | 2989.5  | 0.80   |     |       |        |        |
| 15  | 29.72  | 2987.5  | 0.51   |     |       |        |        |

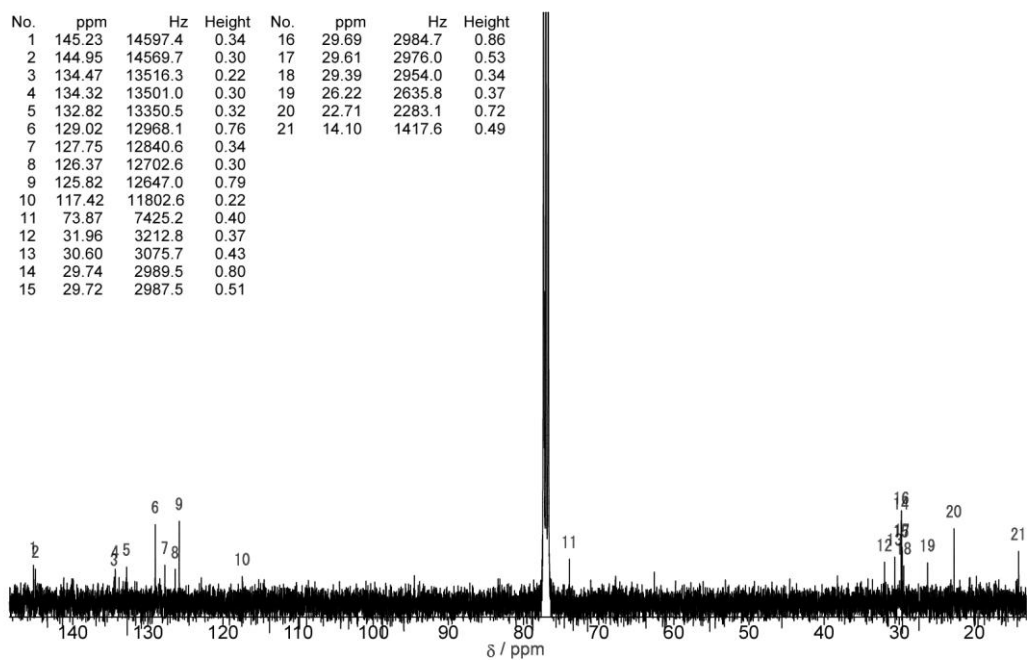

Supplement: c3ra41822g.pdf [file c3ra41822g.pdf]
